# Supplementary material
Source: publisher figshare collection journal article supplement (https://tandf.figshare.com/ndownloader/files/17811320)
Supplement: Supplementary file 1 [file 17811320]

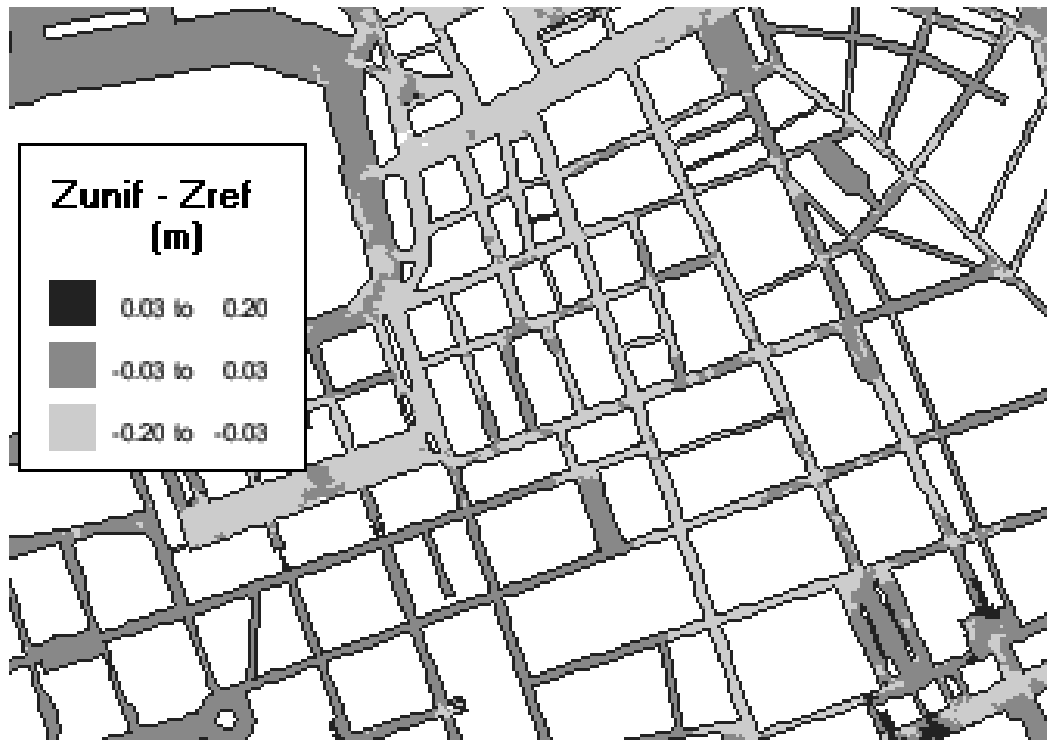

- 1
- 2 Marseille flood event - Difference in computed peak water depths between uniform rainfall simulation
- 3 and reference rainfall (Rainfall B) simulation near the Vieux Port area basin outlet).

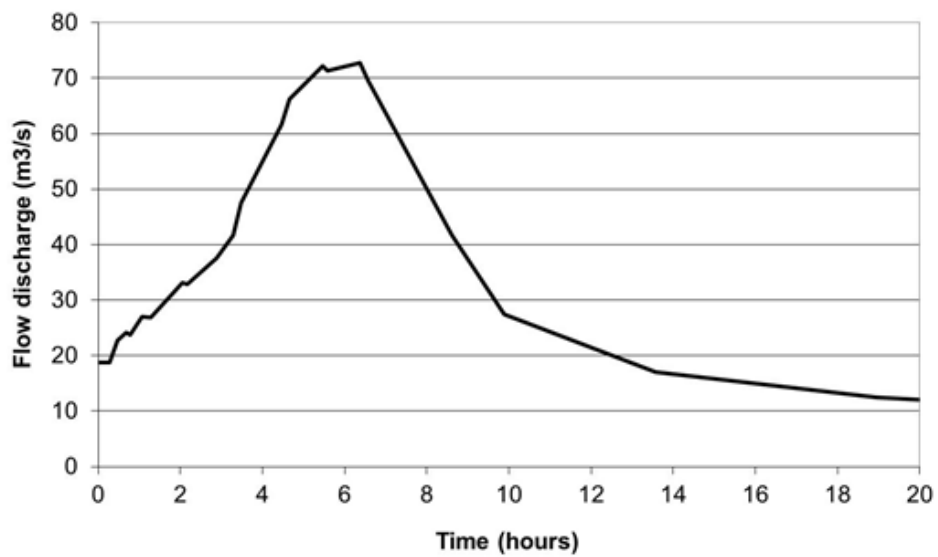

- 4
- 5 Oullins flood event - Discharge hydrograph on Yzeron River during the November 2008 flood event
- 6 (measured at Taffignon station).

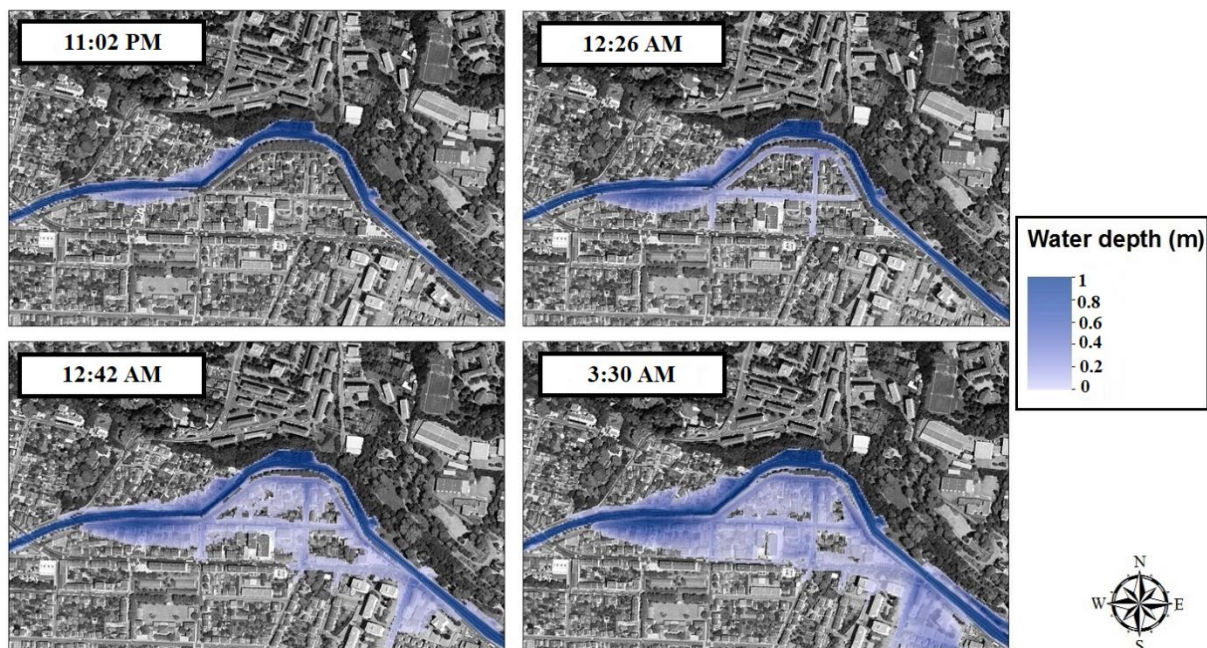

Oullins flood event - Reference run *obk* - Flood water depth field over time until peak flow (adapted from Bazin 2013).

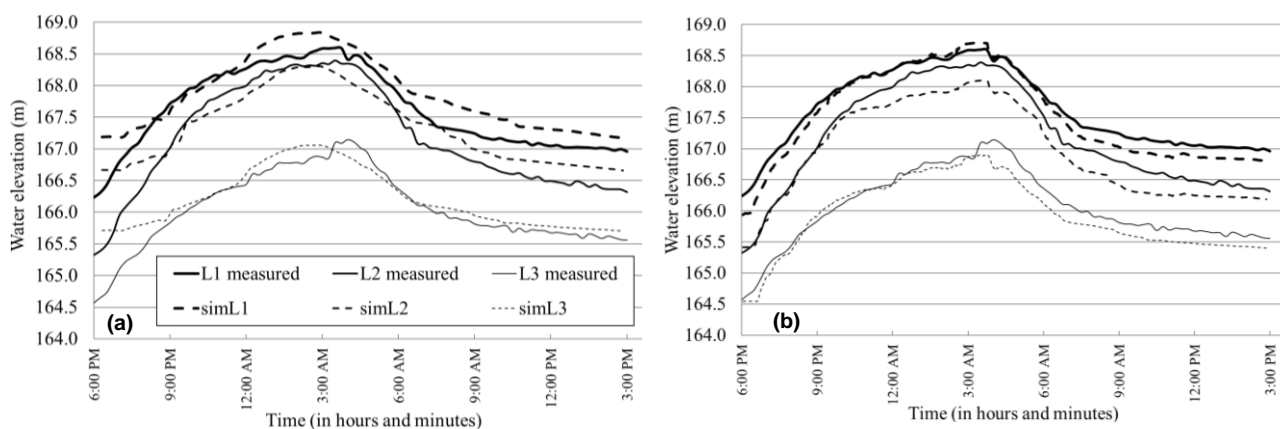

Oullins flood event - Comparison of measured and simulated water levels for (a) *obk* and (b) *obkWS* runs (adapted from (Bazin 2013)).
